# Supplementary material for: Disturbed flow–induced Gs-mediated signaling protects against endothelial inflammation and atherosclerosis
Source: JCI journal article supplement (doi:10.1172/jci.insight.140485), 2020-12-02
Supplement: sd1 [file 1]

## Supplemental material

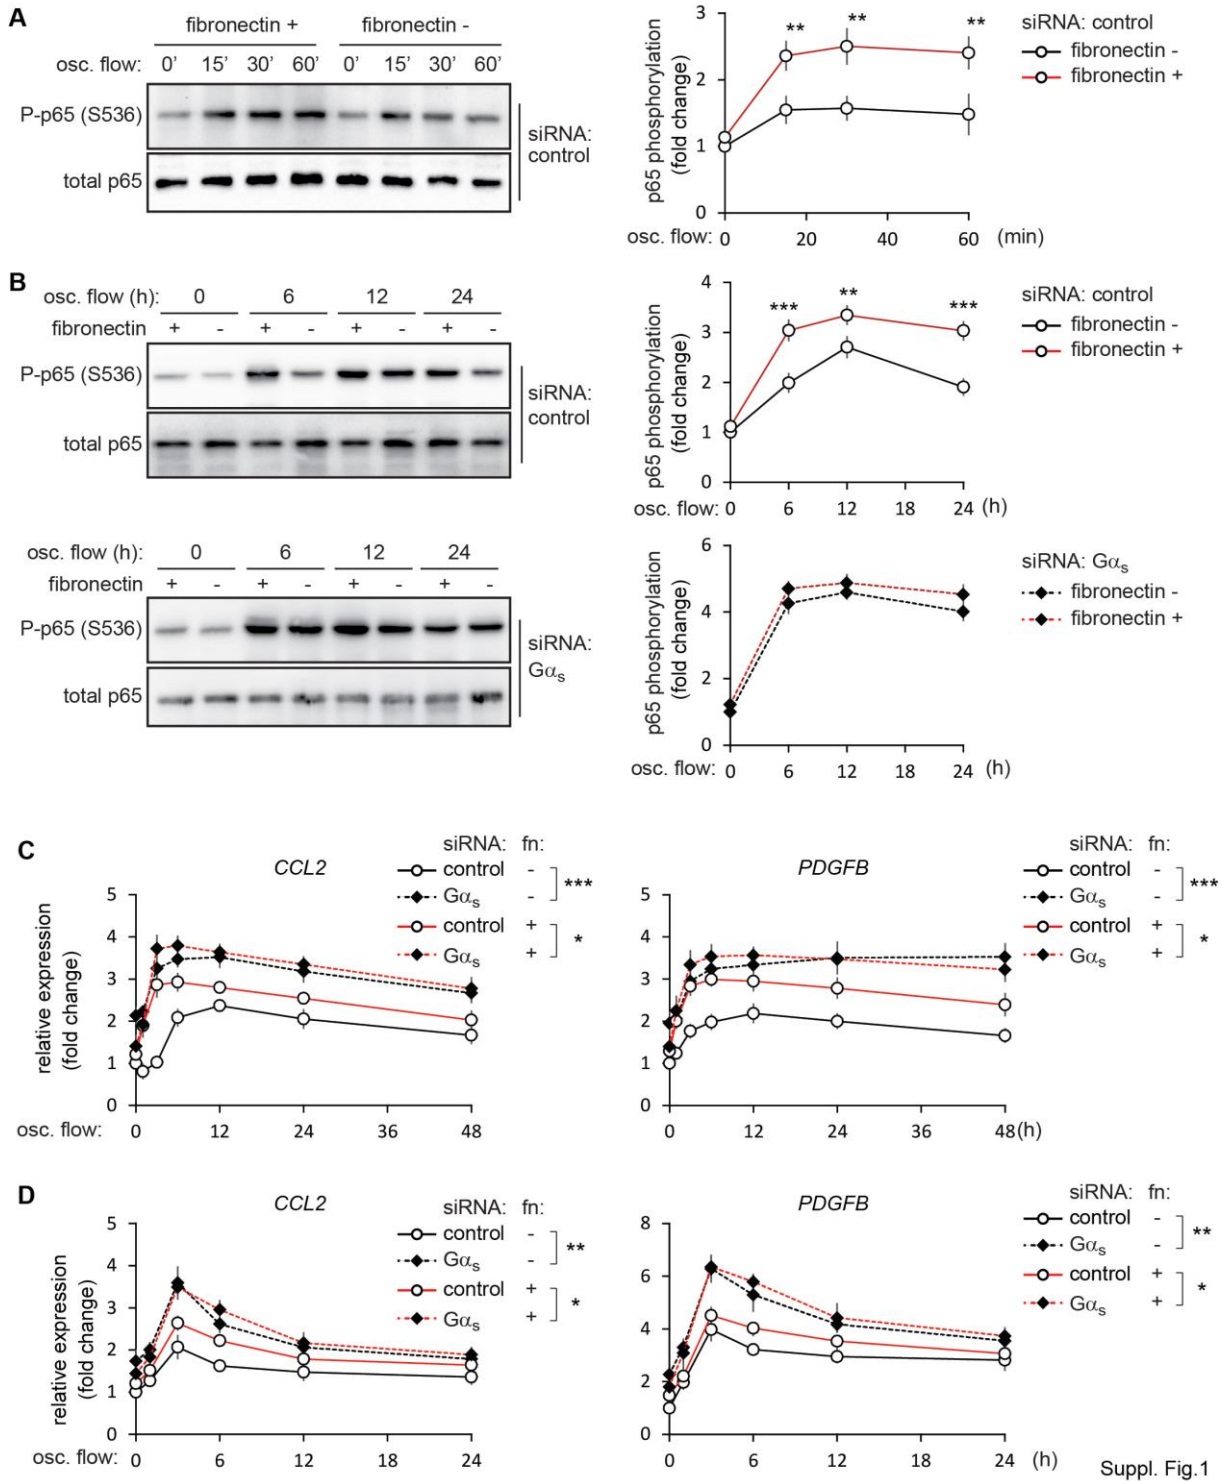

**Suppl. Figure 1. Effect of the fibronectin coating of flow chambers on disturbed flow-induced endothelial inflammatory signaling.** BAECs (A-C) or HUVECs (D) were seeded in flow chambers with or without fibronectin (fn) coating. After transfection of control siRNA (control) or siRNA directed against  $G\alpha_s$ , oscillatory flow (5 dynes/cm<sup>2</sup>

with a frequency of 1 Hz) was applied for the indicated time periods. **(A and B)** Levels of phosphorylated p65 was determined by immunoblotting. The diagrams show the densitometric evaluation of immunoblots (n=3 independent experiments). **(C and D)** Expression of inflammatory genes in BAEC (C) and in HUVECs (D) was analyzed by qRT-PCR (n=3 independent experiments). (Data represent mean values  $\pm$  SD; \*  $P \leq 0.05$ , \*\* $P \leq 0.01$ , \*\*\* $P \leq 0.001$  (two-way ANOVA and Bonferroni's post hoc test)).

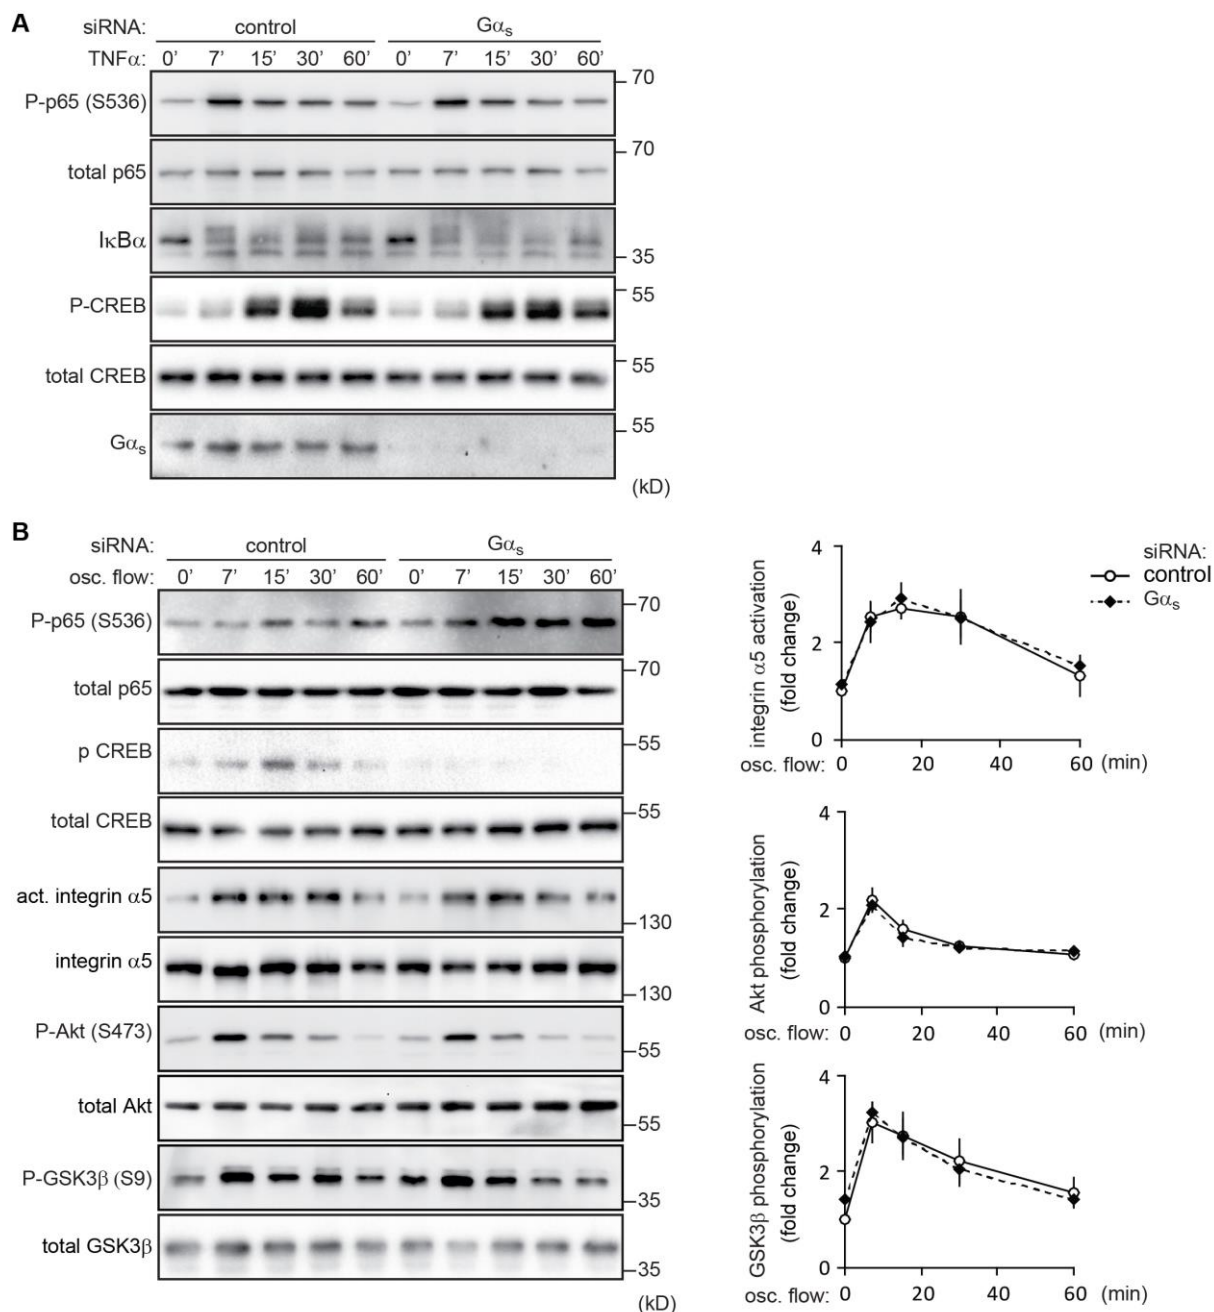

Suppl. Fig.2

**Suppl. Figure 2. Effect of endothelial  $G\alpha_s$  deletion on disturbed flow or TNF $\alpha$  induced signaling. (A)** Control or  $G\alpha_s$  knock-down HUVECs were incubated with TNF $\alpha$  (10 ng/ml) for the indicated time periods. Phosphorylation of p65 and CREB, as well as levels of I $\kappa$ B $\alpha$  and  $G\alpha_s$  were determined by immunoblotting. **(B)** Control or  $G\alpha_s$  knock-down BAECs were exposed to oscillatory (osc.) flow for the indicated time periods. Levels of phosphorylated p65, activated (act.) integrin  $\alpha$ 5 (antibody SNAKA51), phosphorylated AKT and GSK3 $\beta$  were determined by immunoblotting. The

diagrams show the densitometric evaluation of integrin  $\alpha_5$  activation, AKT phosphorylation and GSK3 $\beta$  phosphorylation normalized to total integrin  $\alpha_5$ , AKT and GSK3 $\beta$  respectively (n=3 independent experiments). (Data represent mean values  $\pm$  SD; \*P  $\leq$  0.05, \*\*P  $\leq$  0.01, \*\*\*P  $\leq$  0.001 (two-way ANOVA and Bonferroni's post hoc test)).

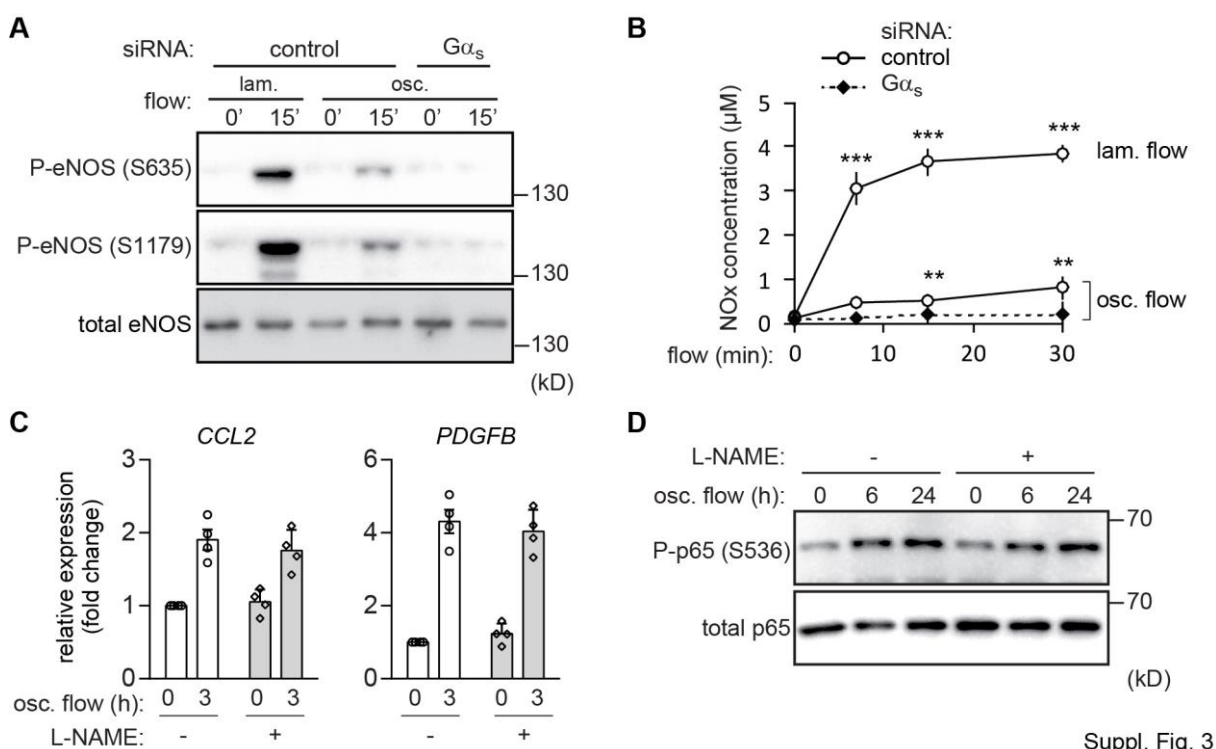

Suppl. Fig. 3

**Suppl. Figure 3. eNOS activation and p65 phosphorylation induced by oscillatory flow. (A and B)** Control or  $G\alpha_s$  knock-down BAECs were exposed to oscillatory (osc.) flow or laminar (lam.) flow for the indicated time periods. eNOS phosphorylation (A) or Nitrate/nitrite levels (NOx) in the cell culture medium (B, n=3 independent experiments) were determined. **(C and D)** Confluent BAECs were incubated without or with L-NAME (100  $\mu$ M) for 30 min, followed by induction of osc. flow. Inflammatory gene expression (C, n=4 independent experiments) and NF- $\kappa$ B (p65) phosphorylation (D) were determined. (Data represent mean values  $\pm$  SD; \*, P  $\leq$  0.05; \*\*, P  $\leq$  0.01; \*\*\*, P  $\leq$  0.001 (two-way ANOVA and Bonferroni's post hoc test)).

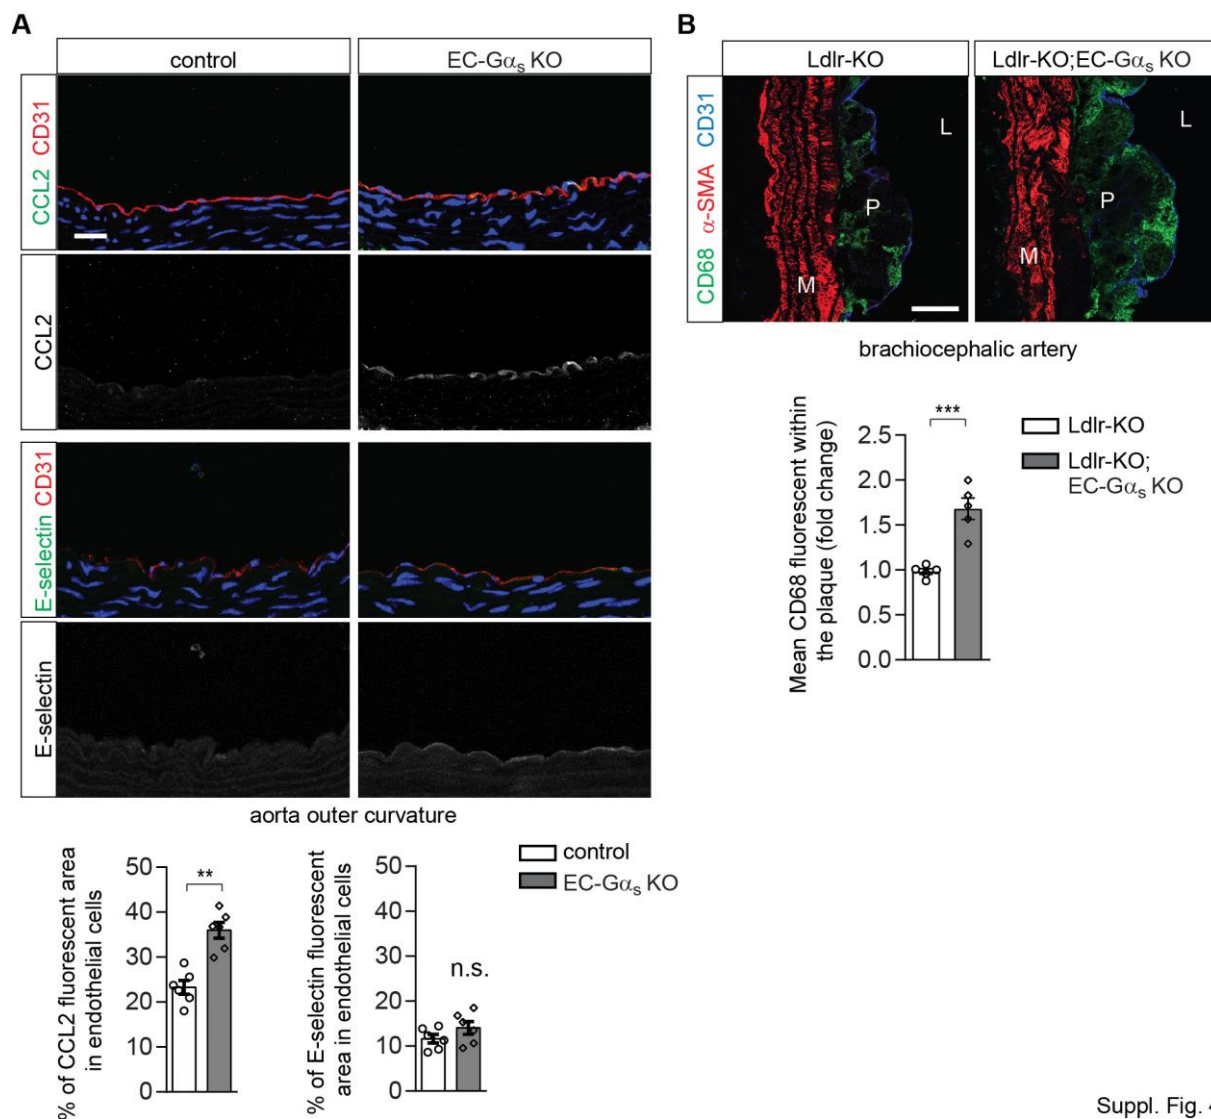

Suppl. Fig. 4

**Suppl. Figure 4. Inflammatory changes in mice lacking endothelial  $G\alpha_s$ .** (A) Cross sections of the outer curvatures of aortic arches of control or EC- $G\alpha_s$ -KO mice stained with DAPI (blue) and antibodies against CCL2, E-selectin (green) or CD31 (red). Bar diagrams show percentage of area stained by anti-CCL2 or anti-E-selectin antibodies of total endothelial cell area stained with anti-CD31 antibody (n=6 mice per group). Bar length: 25  $\mu$ m. (B) Immunohistochemistry of atherosclerotic plaques observed in brachiocephalic arteries using anti-CD68 antibody. Bar length: 25  $\mu$ m. L: lumen, M: media wall, P: plaque. The bar diagrams show the statistical evaluation of the mean fluorescent intensity indicating CD68 within the lesion (n=5 mice per group). (Data represent mean  $\pm$  SEM; \*\*P  $\leq$  0.01, \*\*\*P  $\leq$  0.001, n.s. not significant (Student's *t*-test)).

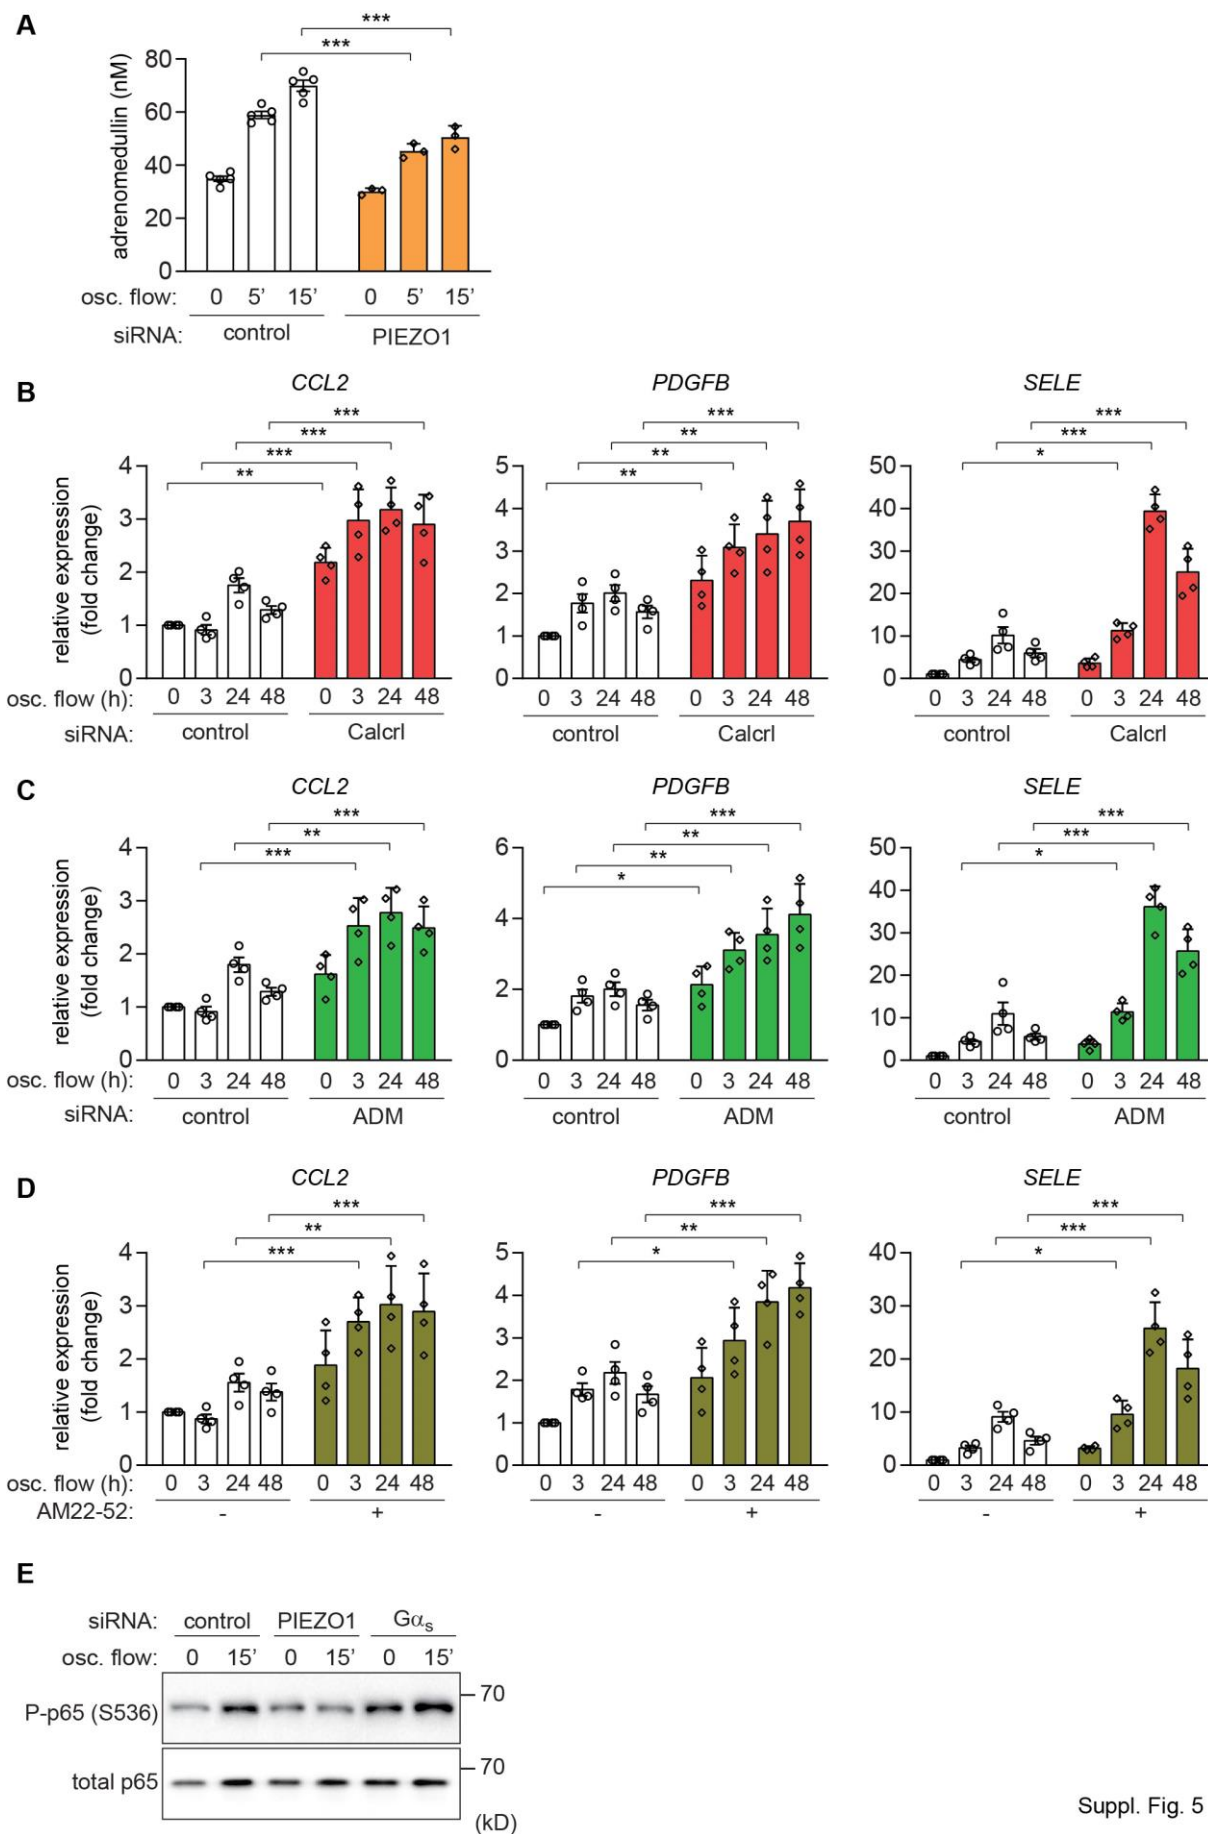

**Suppl. Figure 5. Adrenomedullin release and anti-inflammatory signaling activation in the absence CALCRL, adrenomedullin or PIEZO1.** Confluent BAECs were transfected with control siRNA (control) or siRNA directed against PIEZO1 (A and E), CALCRL (B) or ADM (C), or were incubated without or with 1  $\mu$ M AM22-52 (D). Thereafter, cells were exposed to oscillatory (osc.) flow. **(A)** Adrenomedullin concentration in the cell culture medium was determined (n=2 independent experiments). **(B-D)** Expression of inflammatory genes was analyzed by qRT-PCR (n=4 independent experiments). **(E)** NF- $\kappa$ B (p65) phosphorylation was determined by immunoblotting. (Data represent mean values  $\pm$  SD; \*P  $\leq$  0.05, \*\*P  $\leq$  0.01, \*\*\*P  $\leq$  0.001 (two-way ANOVA and Bonferroni's post hoc test)).

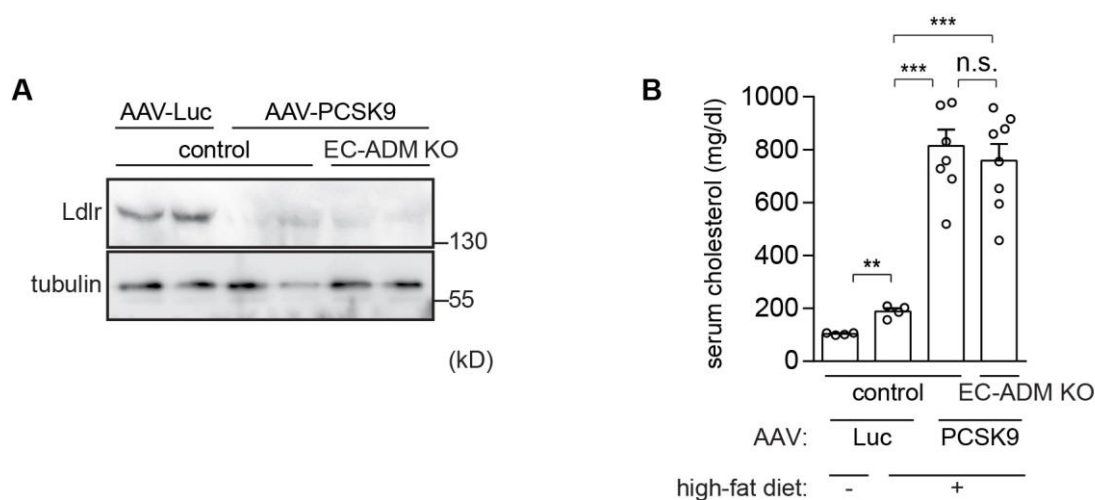

Suppl. Fig. 6

**Suppl. Figure 6. Confirmation of loss of LDL receptor in the liver and induction of hypercholesterolemia by AAV-PCSK9.** (A and B) control or EC-ADM KO mice were injected with AAV-PCSK9 or AAV-Luc ( $1 \times 10^{11}$  VG/mouse) and fed a high-fat diet for two weeks. (A) Western blot analysis showing the expression level of LDL receptors in the liver. (B) Serum total cholesterol level from mice treated with AAV-PCSK9 or AAV-Luc and fed a normal or high-fat diet for two weeks (n=4:AAV-Luc, n=7:control;AAV-PCSK9, n=8:EC-ADM KO;AAV-PCSK9). (Data represent mean  $\pm$  SEM; \*\*P  $\leq$  0.01, \*\*\*P  $\leq$  0.001, n.s. not significant (Student's *t*-test)).

**Suppl. Table 1. Effect of knock-down of different GPCRs on oscillatory flow induced NF- $\kappa$ B activation.**

| <b>siRNA</b>                 | <b>no flow</b> | <b>osc. flow</b>   | <b>ratio<br/>osc. flow / no flow</b> |
|------------------------------|----------------|--------------------|--------------------------------------|
| <b>control</b>               | <b>1</b>       | <b>1,013894086</b> | <b>1,013894086</b>                   |
| <b>Adora2b</b>               | 0,966292711    | 0,672845579        | <b>0,697216345</b>                   |
| <b>Eltf1</b>                 | 0,821819439    | 0,654394979        | <b>0,80185291</b>                    |
| <b>Gpr124</b>                | 1,034879706    | 1,062897           | <b>1,026439299</b>                   |
| <b>Lpar6</b>                 | 0,959544177    | 1,068188077        | <b>1,112072415</b>                   |
| <b>Gpr126</b>                | 1,011552949    | 1,133938333        | <b>1,133374923</b>                   |
| <b>Lphn2</b>                 | 0,990893907    | 1,121887483        | <b>1,139250019</b>                   |
| <b>Gpr107</b>                | 1,039058363    | 1,190368336        | <b>1,141775022</b>                   |
| <b>Gpr116</b>                | 1,015965376    | 1,158461136        | <b>1,150643377</b>                   |
| <b>Ptger4</b>                | 0,996926447    | 1,164555219        | <b>1,169831204</b>                   |
| <b>Ccr1</b>                  | 1,038192249    | 1,219009794        | <b>1,174433434</b>                   |
| <b>Tpra1</b>                 | 1,036796225    | 1,288150279        | <b>1,249416684</b>                   |
| <b>Gpr161</b>                | 0,953154222    | 1,323616831        | <b>1,380241228</b>                   |
| <b>Gpr137</b>                | 0,985451837    | 1,603836068        | <b>1,60840146</b>                    |
| <b>Cxcr7</b>                 | 0,981254864    | 1,931748948        | <b>1,993668987</b>                   |
| <b>Calcrl</b>                | 1,170422337    | 2,500507013        | <b>2,128897187</b>                   |
| <b>Gpr146</b>                | 1,194921379    | 3,005843384        | <b>2,515383099</b>                   |
| <b>G<math>\alpha</math>s</b> | 1,172386067    | 3,28698971         | <b>2,802688848</b>                   |

Confluent BAECs were transfected with control siRNA or siRNAs against G $\alpha$ <sub>s</sub> or the indicated GPCRs and were then exposed to oscillatory (osc.) flow for 15 min or were left unflowed (no flow). NF- $\kappa$ B activation was analyzed by determining p65 phosphorylation using immunoblotting as shown in Fig. 4A. Immunoblot signals were quantified and the P-p65 signal was normalized to the total p65 signal. Shown are relative values (control, no flow : 1) (n=3 independent experiments).
